# Supplementary material for: Clinicopathological findings of pediatric NTRK fusion mesenchymal tumors
Source: PubMed Central journal article supplement (PMC7507612; doi:10.1186/s13000-020-01031-w), 2020-09-21

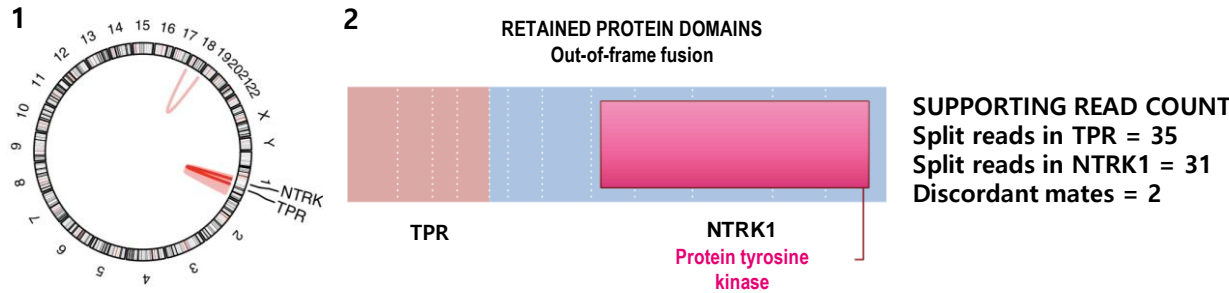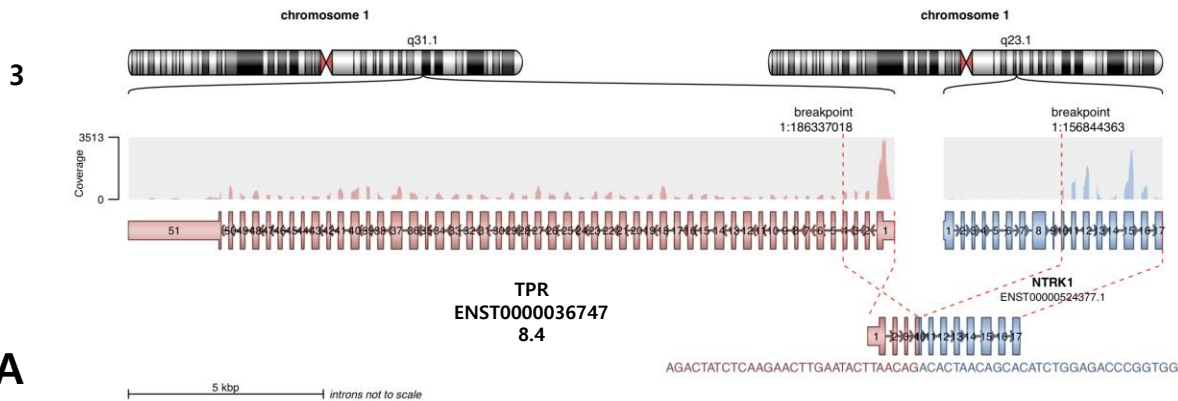

**A**

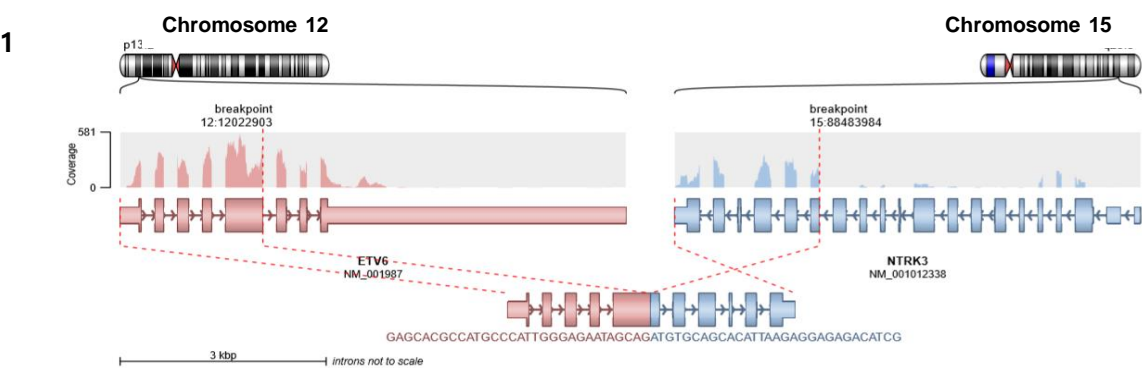

**2**

**C**

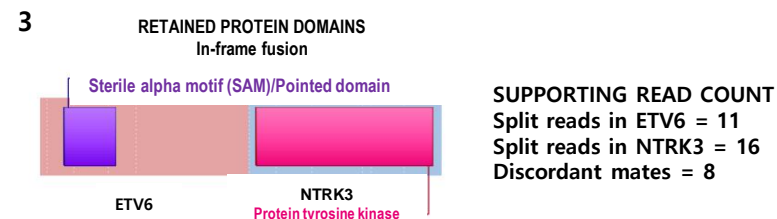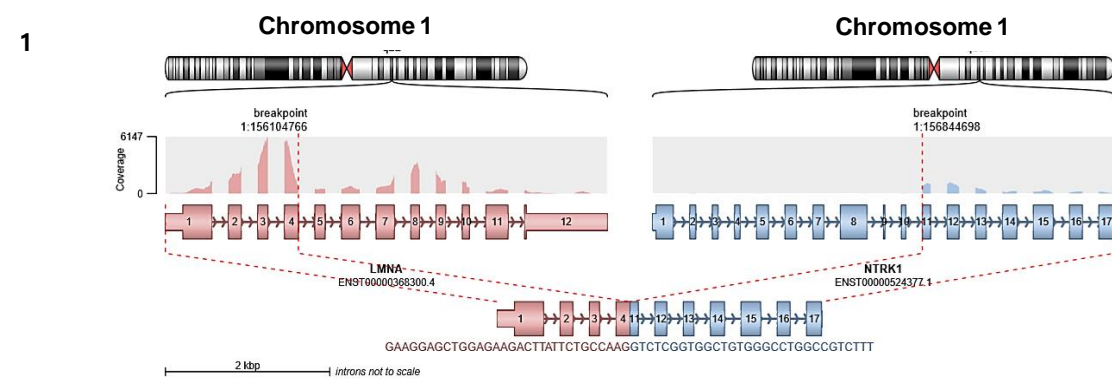

**2**

**B**

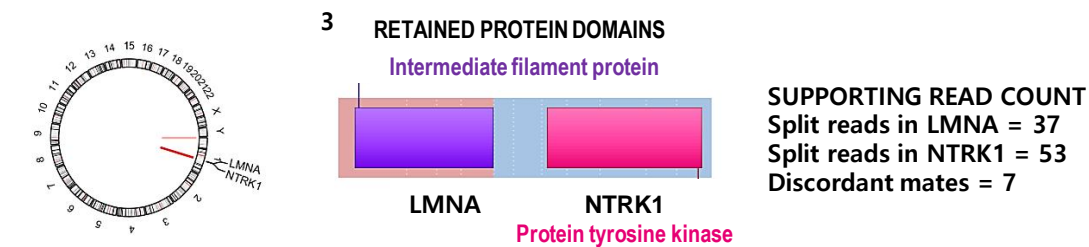

**1**

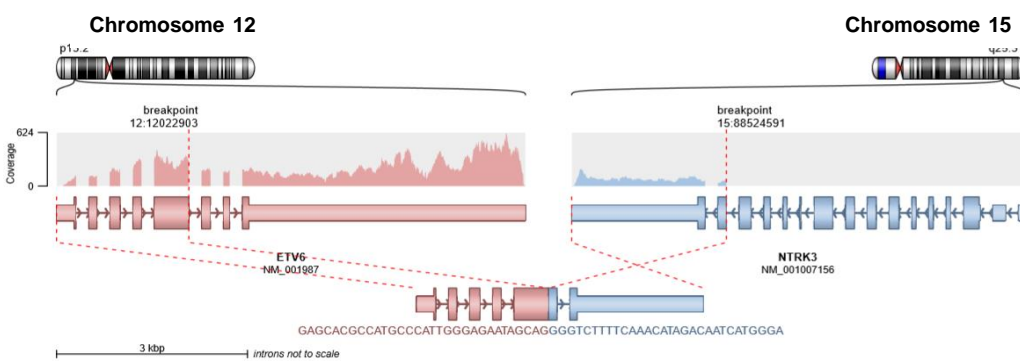

**2**

**D**

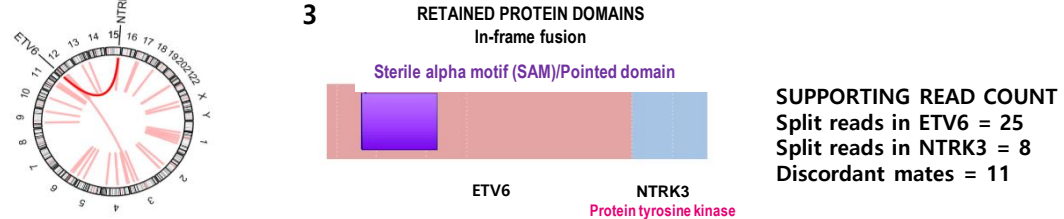

Supplement: 13000_2020_1031_MOESM2_ESM.pdf [file 13000_2020_1031_MOESM2_ESM.pdf]
